# Supplementary material
Source: Springer Nature journal article supplement (https://www.springermedizin.de/resource/supplementary/12911_2005_84_MOESM12_ESM.pdf/9527092)

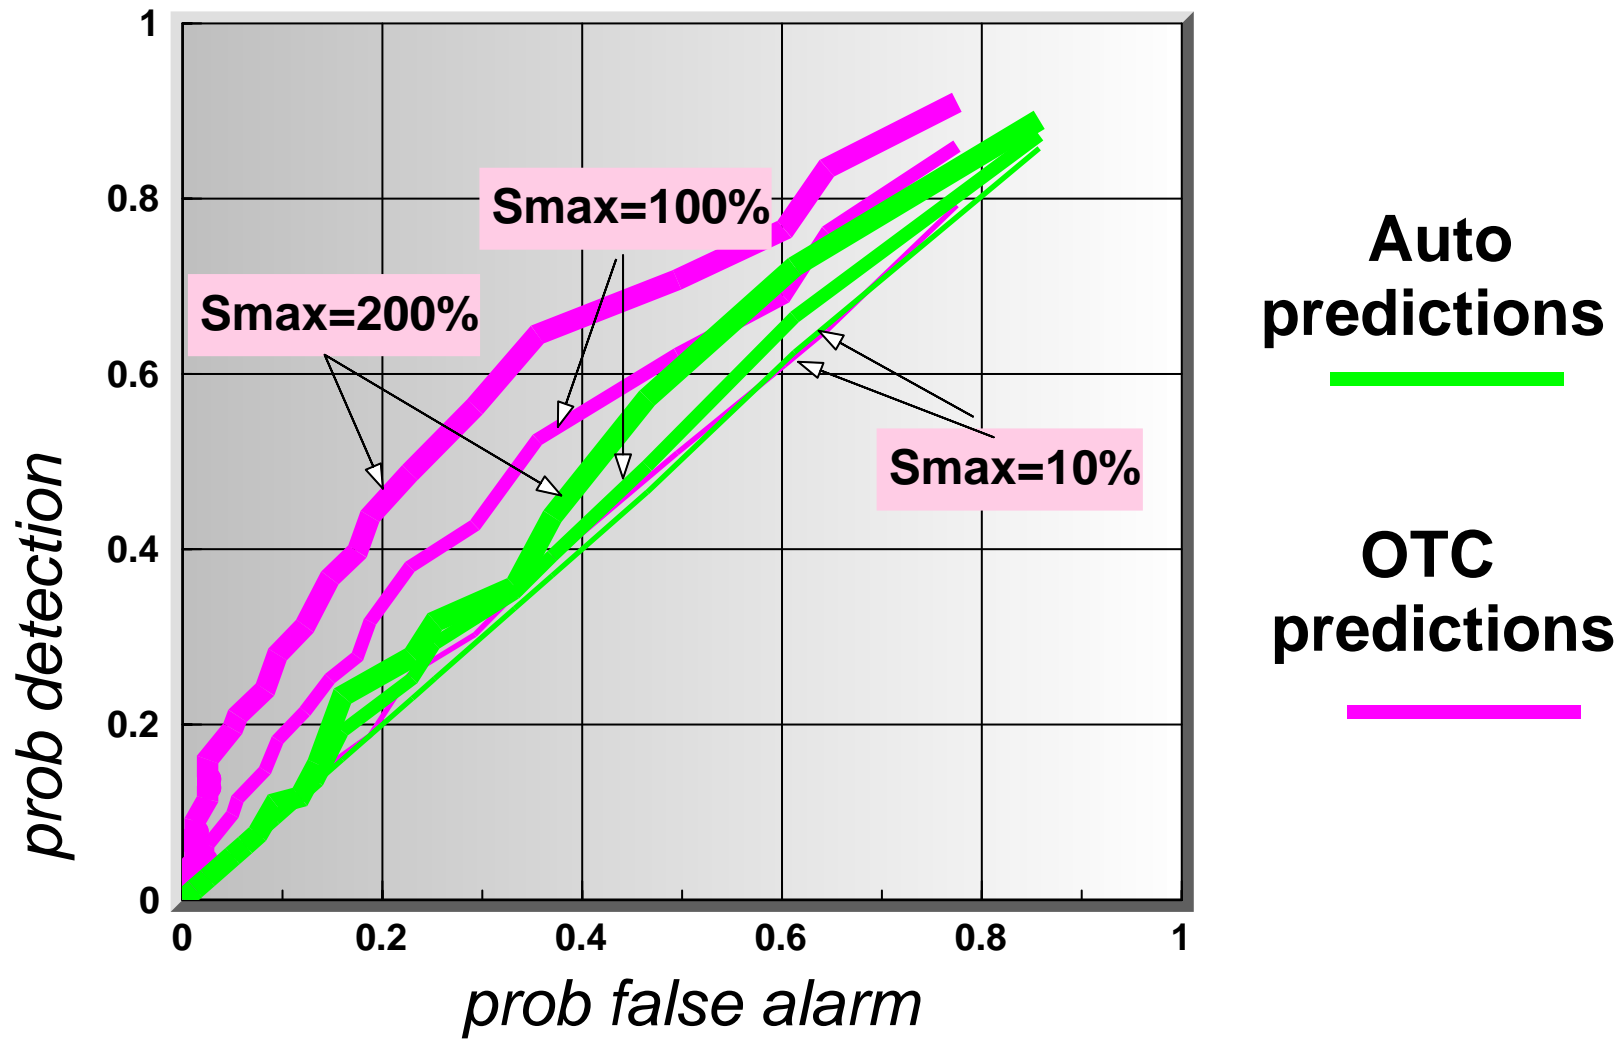

Supplement: MOESM12 [file 9527092]
